# Supplementary material
Source: PubMed Central journal article supplement (PMC5994145)
Supplement: Supp_Data.pdf [file Supp_Data.pdf]

## Supplementary Data

Supplementary Figure S1A–C depicts results from three representative experiments that illustrate development of tolerance and failure for dose titration to produce the desired effect.

We show that doubling the IV dose of N<sup>6</sup>-cyclohexyladenosine (CHA) four consecutive times had no effect on core temperature (Supplementary Fig. S1A: arrows: a–d). A subsequent IP injection of 0.5 mg/kg (arrow: e) produced a large drop in core T<sub>b</sub> that was not sustained despite continuous IV infusion of 0.4 mg/(kg·h). One hour later 0.5 mg/kg CHA delivered via IV bolus (arrow: f) resulted in a smaller drop in core T<sub>b</sub> than the preceding IP bolus.

Similarly, in another experiment (Supplementary Fig. S1B), we observed tolerance with two IP loading doses separated by 20 hours. A loading dose of 0.5 mg/kg, IP, followed by continuous IV infusion (arrow: a) resulted in a large and sustained drop in T<sub>b</sub>. Repeating the same IP loading dose and doubling the dose of continuous IV infusion (arrow: b) produced a smaller fall in T<sub>b</sub> than in (arrow: a). Increasing the dose of CHA delivered via continuous IV infusion fivefold, 20 hours later, produced a 4°C drop in T<sub>b</sub>, but the lower T<sub>b</sub> was not sustained despite continuous infusion (arrow: c). A

final IP injection, twice the original dose (arrow: d), failed to decrease T<sub>b</sub>.

Finally, (Supplementary Fig. S1C) illustrates an example where increasing the dose of IV infusion at intervals of less than 12 hours eventually produces a significant decrease in T<sub>b</sub>, but in this case T<sub>b</sub> decreased below the target T<sub>b</sub> of 30–32°C. In this animal, both T<sub>brain</sub> and core T<sub>b</sub> were measured. An initial dose of 0.025 mg/(kg·h) IV CHA at an ambient temperature of 17°C had little effect on T<sub>brain</sub> or core T<sub>b</sub> during 4.4 hours of infusion. Doubling the continuous IV dose failed to increase the response to CHA after 7.3 hours. When the dose was doubled, a second time over 4.8 hours T<sub>brain</sub> and core T<sub>b</sub> decreased slightly. Further increase in dose had no additional effect on brain or core T<sub>b</sub> over 4.2 hours of continuous infusion. Further doubling the dose again failed to decrease T<sub>brain</sub> or T<sub>b</sub> over the next 2 hours. The final doubling of dose produced a 6°C decrease in T<sub>brain</sub> and core T<sub>b</sub> over 6 hours.

In all six experiments in which T<sub>brain</sub> and T<sub>b</sub> were monitored in the same animal, T<sub>brain</sub> decreased at the same rate as T<sub>b</sub>, as shown in this representative example. These results show that titrating the dose of CHA fails to produce a consistent or controlled decrease in T<sub>b</sub>.

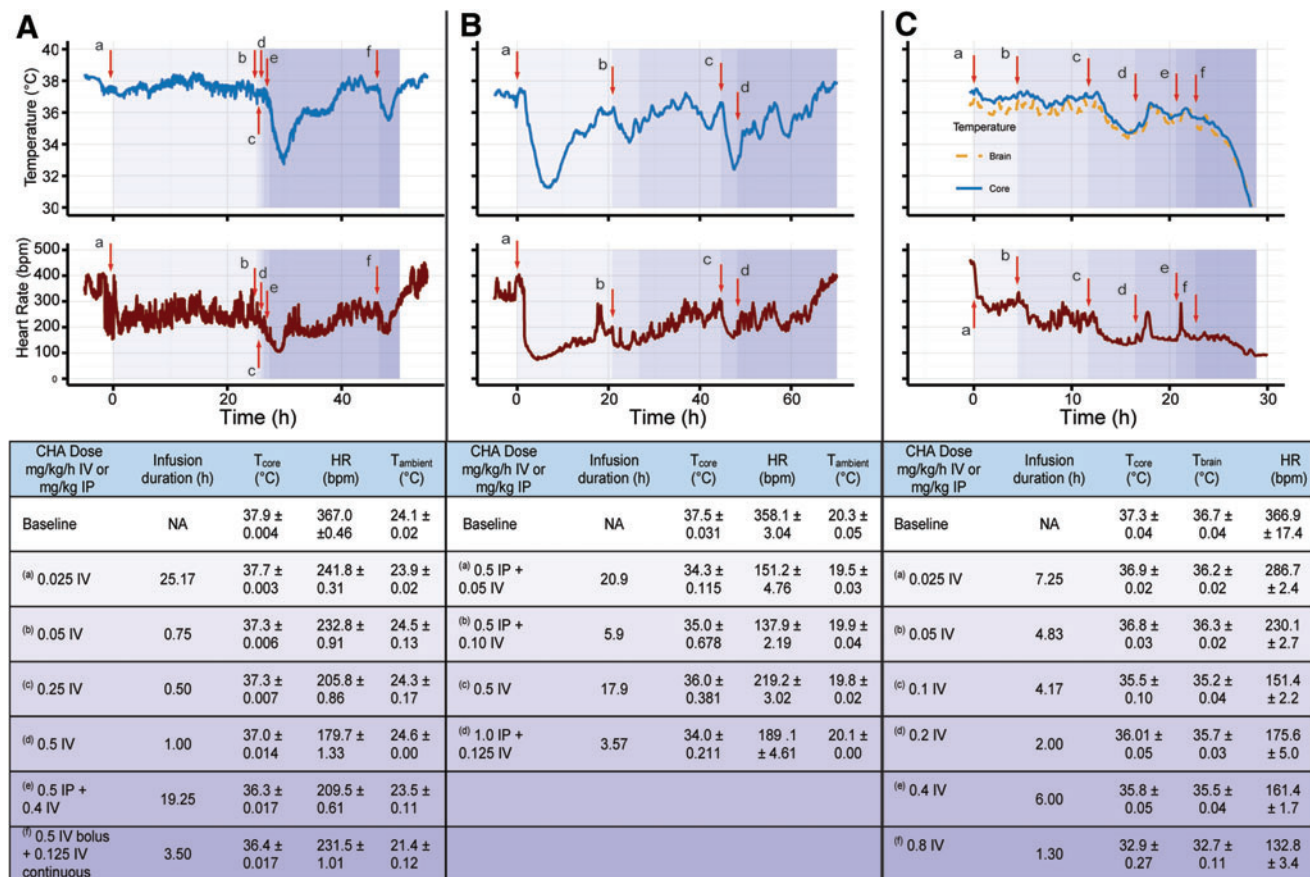

**SUPPLEMENTARY FIG. S1.** Three representative samples depicting the development of tolerance under various CHA administration protocols. Start of CHA administration is depicted by arrows, and change in dose is correlated with change in background color and letters (a–f) in the table. Table columns correspond to graphs immediately above each column. Values in table are mean ± SEM for the duration of dose. (A) Protocol of increasing the IV dose six times and administration of both and IP and IV bolus. (B) Protocol of IP loading dose followed by continuous IV dose. (C) Protocol of sequentially doubling the IV dose. Both brain and core body temperature decrease at the same rate. Representative example of T<sub>brain</sub> and T<sub>b</sub> monitored in the same animal shows that T<sub>brain</sub> decreases at the same rate as T<sub>b</sub>. CHA, N<sup>6</sup>-cyclohexyladenosine; T<sub>b</sub>, body temperature; T<sub>brain</sub>, brain temperature.
